# Prevalence of Clinical and Isolated Subclinical Cardiovascular Disease in Older Adults With Glucose Disorders

## The Cardiovascular Health Study

JOSHUA I. BARZILAY, MD<sup>1</sup>  
CHARLES F. SPIEKERMAN, PHD<sup>2</sup>  
LEWIS H. KULLER, MD<sup>3</sup>  
GREGORY L. BURKE, MD<sup>4</sup>  
VERA BITTNER, MD<sup>5</sup>

JOHN S. GOTTDIENER, MD<sup>6</sup>  
FRED L. BRANCATI, MD<sup>7</sup>  
TREVOR J. ORCHARD, MD<sup>3</sup>  
DANIEL H. O'LEARY, MD<sup>8</sup>  
PETER J. SAVAGE, MD<sup>9</sup>

**OBJECTIVE** — Clinical cardiovascular disease (CVD) is highly prevalent among people with diabetes. However, there is little information regarding the prevalence of subclinical CVD and its relation to clinical CVD in diabetes and in the glucose disorders that precede diabetes.

**RESEARCH DESIGN AND METHODS** — Participants in the Cardiovascular Health Study, aged  $\geq 65$  years ( $n = 5,888$ ), underwent vascular and metabolic testing. Individuals with known disease in the coronary, cerebral, or peripheral circulations were considered to have clinical disease. Those without any clinical disease in whom CVD was detected by ultrasonography, electrocardiography, or ankle arm index in any of the three vascular beds were considered to have isolated subclinical disease.

**RESULTS** — Approximately 30% of the cohort had clinical disease, and  $\sim 60\%$  of the remainder had isolated subclinical disease. In those with normal glucose status, isolated subclinical disease made up most of the total CVD. With increasing glucose severity, the proportion of total CVD that was clinical disease increased; 75% of men and 66% of women with normal fasting glucose status had either clinical or subclinical CVD. Among those with known diabetes, the prevalence was  $\sim 88\%$  (odds ratio [OR] 2.46 for men and 4.22 for women,  $P < 0.0001$ ). There were intermediate prevalences and ORs for those with impaired fasting glucose status and newly diagnosed diabetes.

**CONCLUSIONS** — Isolated subclinical CVD is common among older adults. Glucose disorders are associated with an increased prevalence of total CVD and an increased proportion of clinical disease relative to subclinical disease.

*Diabetes Care* 24:1233–1239, 2001

From the <sup>1</sup>Division of Endocrinology, Kaiser Permanente of Georgia, and Division of Endocrinology, Emory University School of Medicine, Atlanta, Georgia; the <sup>2</sup>Department of Biostatistics, University of Washington, Seattle, Washington; the <sup>3</sup>Department of Epidemiology, Graduate School of Public Health, University of Pittsburgh, Pittsburgh, Pennsylvania; the <sup>4</sup>Department of Public Health Sciences, Wake Forest University School of Medicine, Winston-Salem, North Carolina; the <sup>5</sup>Department of Cardiovascular Disease, University of Alabama at Birmingham, Birmingham, Alabama; the <sup>6</sup>Department of Cardiology, St. Francis Hospital, Roslyn, New York; the <sup>7</sup>Department of Epidemiology, Johns Hopkins School of Hygiene and Public Health, Baltimore, Maryland; the <sup>8</sup>Department of Radiology, Tufts–New England Medical Center, Boston, Massachusetts; and the <sup>9</sup>Division of Epidemiology and Clinical Applications, National Heart, Lung, Blood Institute, National Institutes of Health, Bethesda, Maryland.

Address correspondence and reprint requests to Joshua Barzilay, MD, Kaiser Permanente of Georgia, 200 Crescent Center Parkway, Tucker, GA 30084. E-mail: joshua.barzilay@kp.org.

Received for publication 19 December 2000 and accepted in revised form 26 March 2001.

**Abbreviations:** AAI, ankle-arm index; ADA, American Diabetes Association; BP, blood pressure; CBD, cerebrovascular disease; CHS, Cardiovascular Health Study; CVD, cardiovascular disease; ECG, electrocardiogram; IFG, impaired fasting glucose; OR, odds ratio; PAD, peripheral arterial disease; WHO, World Health Organization.

A table elsewhere in this issue shows conventional and Système International (SI) units and conversion factors for many substances.

The development of noninvasive cardiovascular technology has led to the appreciation that individuals without clinical cardiovascular disease (CVD) often have significant underlying subclinical CVD. Subclinical disease is a strong risk factor for clinical CVD (1–4). Knowledge of the prevalence of subclinical disease in asymptomatic patients is therefore of interest to the clinician for the purposes of risk stratification.

It is well documented that individuals with glucose disorders have a high prevalence of clinical coronary, cerebral, and peripheral arterial disease (5). Few studies, however, have looked at the prevalence of subclinical disease in these vascular beds or the overall burden of clinical and subclinical CVD among them. This issue is especially important in older adults, in whom glucose disorders have their highest prevalence and their greatest absolute impact on health.

In this study, we present prevalence data of simultaneous clinical and subclinical CVD in three vascular beds in a cohort of adults  $\geq 65$  years of age categorized by glucose status. All were members of the Cardiovascular Health Study (CHS), a longitudinal study to identify factors related to the onset and course of coronary heart disease and stroke in elderly individuals. We attempt to give an overview of the total burden of CVD in the elderly and how it is affected by glucose disorders. To our knowledge, such an approach has not previously been undertaken.

## RESEARCH DESIGN AND METHODS

Recruitment methods for CHS have been published previously (6). Individuals invited to participate in the study were selected from a random sample of Medicare eligibility lists. Potential participants were excluded if they were institutionalized, confined to a wheelchair in the home, or had severe illness that was expected to lead to early

death. Subjects were recruited in two phases. In the first phase, 5,201 eligible men and women (4,926 [94.7%] white, 245 [4.7%] African-American, 30 [0.6%] other)  $\geq 65$  years of age, agreed to participate. This cohort is called the original cohort. A second phase was later undertaken to provide additional representation of African-Americans. A total of 687 similarly aged members (678 [98.7%] African-Americans, 9 [1.3%] other) were recruited in a manner similar to the first phase.

### Baseline examination

After an overnight fast, venipuncture was performed at the start of the clinic visit. Plasma glucose levels were measured on a Kodak Ektachem 700 Analyzer (Ektachem Test Methodologies, Eastman Kodak, Rochester, NY) (7). Then, 12-lead electrocardiograms (ECGs) were obtained from all participants using a MAC PC-DT ECG recorder (Marquette Electronics, Milwaukee, WI) (8). These were interpreted using a Novacoder ECG measurement and classification system (9). Duplex ultrasonographs of the carotid arteries were also obtained and interpreted as described previously (10). Duplicate measurements of supine blood pressure (BP) in the right arm and both ankles were recorded to derive the ankle-arm index (AAI) (11). During the clinic visit, participants were questioned regarding prior health, and the answers were subsequently validated from clinical records and history.

The analyses performed for this study are based on the updated CHS database, which incorporates minor corrections through June 1999.

### Disease categories

As previously reported (12), clinical CVD was defined as self-report (confirmed by medical record review) of the following: 1) cardiac disease—myocardial infarction, symptoms of congestive heart failure, angina pectoris, use of nitroglycerin, coronary artery bypass graft surgery, percutaneous transluminal coronary angioplasty, insertion of a pacemaker, or known atrial fibrillation; 2) cerebrovascular disease (CBD)—cerebrovascular accident or transient ischemic attack; 3) peripheral arterial disease (PAD)—intermittent claudication or history of surgery for PAD.

Isolated subclinical CVD was defined as any of the following in the absence of

**Table 1—Distribution of clinical CVD among CHS participants**

|                       | Total        | Sex          |              |
|-----------------------|--------------|--------------|--------------|
|                       |              | Male         | Female       |
| <i>n</i>              | 5,712        | 2,419        | 3,293        |
| No clinical CVD*      | 3,946 (69.1) | 1,525 (63.0) | 2,421 (73.5) |
| Clinical CVD          | 1,766 (30.9) | 894 (37.0)   | 872 (26.5)   |
| Cardiac†              | 1,203 (68.1) | 594 (66.4)   | 609 (69.8)   |
| CBD                   | 203 (11.5)   | 104 (11.6)   | 99 (11.4)    |
| PAD                   | 80 (4.5)     | 38 (4.3)     | 42 (4.8)     |
| Cardiac and CBD       | 180 (10.2)   | 102 (11.4)   | 78 (8.9)     |
| Cardiac and PAD       | 64 (3.6)     | 34 (3.8)     | 30 (3.4)     |
| CBD and PAD           | 13 (0.7)     | 8 (0.9)      | 5 (0.6)      |
| Cardiac, CBD, and PAD | 23 (1.4)     | 14 (1.6)     | 9 (1.1)      |

Data are *n* (%). \*Numbers in parentheses are percentages of total participants, male participants, or female participants; †numbers in parentheses are percentages of participants with clinical disease.

any clinical cardiac disease, CBD, or PAD (12): 1) cardiac—major ECG abnormalities, (Minnesota code [(13)] ventricular conduction defects, major Q/QS or ST-T wave abnormalities, left ventricular hypertrophy, atrial fibrillation, or first-degree atrioventricular block), Rose questionnaire positive response for angina pectoris in the absence of known angina pectoris, or use of nitroglycerin; 2) CBD—increased common and/or internal carotid artery wall thickness ( $>80$ th percentile of each sex and race) or carotid artery stenosis  $>25\%$ ; 3) PAD—AAI  $\leq 0.9$  mmHg or Rose questionnaire positive response for claudication in the absence of known claudication or surgery for PAD.

### Glycemic categories

Each participant's glycemic category was based on the fasting glucose level. Self-report of a history of diabetes without concurrent use of hypoglycemic medication was not considered a defining criteria. Only subjects who had not drunk calorie-containing beverages or eaten within 9 h of blood collection were analyzed. This led to the exclusion of 94 participants (1.8%) in the original cohort. Of the remaining participants, 87 were using insulin, 278 were using oral hypoglycemic agents and 10 were using both. In the African-American cohort, 22 participants (3.2%) had not fasted before examination and were not included in the analysis. Of the remaining participants, 34 were using insulin, 73 were using oral hypoglycemic agents, and 1 was using both. A total of 60 participants from both cohorts did not have a fasting glucose level recorded and

were also excluded. Classification was performed using the fasting American Diabetes Association (ADA) criteria (14). Subjects who met the criteria for diabetes but who were not taking diabetic medications were classified as having newly diagnosed diabetes. Those who were taking glucose-lowering agents were classified as having known diabetes.

### Statistical analysis

Disease prevalences between men and women were compared using the Pearson  $\chi^2$  statistic. Further analyses were stratified by sex. Descriptive statistics were calculated for each glycemic category. Logistic regression was used to compute age- and race-adjusted odds ratios (ORs) comparing disease prevalences among normoglycemic subjects to those in the remaining glycemic categories. Age was categorized into 5-year intervals (65–69, 70–74, 75–79, 80–84, 85+), and race was categorized into white, African-American, and other. Polynomial contrasts were applied treating the glycemic category variables as ordered categorical variables. Wald tests on the linear contrasts were used to test for monotone trend in the log ORs across the glycemic categories. Wald tests were also computed on the quadratic contrasts to elucidate in which models the increase in log odds was greater than a linear trend. The Wald tests were derived from logistic-regression models and adjusted for age and race. Statistical calculations were performed using SPSS for Windows version 10.0.5 (SPSS, Chicago, IL).

**Table 2—Distribution of subclinical CVD in the absence of clinical disease among CHS participants**

|                       | Total        | Sex        |              |
|-----------------------|--------------|------------|--------------|
|                       |              | Male       | Female       |
| n                     | 3,946        | 1,525      | 2,421        |
| No subclinical CVD*   | 1,551 (39.3) | 541 (35.5) | 1,010 (41.7) |
| Subclinical CVD       | 2,395 (60.7) | 984 (64.5) | 1,411 (58.3) |
| Cardiac†              | 387 (16.2)   | 154 (15.7) | 229 (16.2)   |
| CBD                   | 1,249 (52.2) | 502 (51.0) | 747 (52.9)   |
| PAD                   | 74 (3.1)     | 30 (3.0)   | 45 (3.1)     |
| Cardiac and CBD       | 387 (16.2)   | 187 (19.0) | 200 (14.2)   |
| Cardiac and PAD       | 32 (1.3)     | 18 (1.8)   | 14 (1.0)     |
| CBD and PAD           | 192 (8.0)    | 57 (5.8)   | 135 (9.6)    |
| Cardiac, CBD, and PAD | 78 (3.3)     | 36 (3.7)   | 42 (3.0)     |

Data are n (%). \*Numbers in parentheses are percentages of total participants, male participants, or female participants; †numbers in parentheses are percentages of participants with subclinical disease.

**RESULTS** — A total of 5,712 individuals participated in the cohort; 2,419 (42.3%) were men (2,083 white, 321 African-American, and 15 other). Mean age was 73.3 years. A total of 3,293 (57.7%) of the participants were women (2,729 white, 542 African-American, and 22 other). Mean age was 72.5 years. Among men,

66.4% were normoglycemic, 14.8% had impaired fasting glucose (IFG), and 18.8% had diabetes (8.9% newly diagnosed, 9.9% known). Among women, 73.2% were normoglycemic, 12.6% had IFG, and 14.2% had diabetes (6.9% newly diagnosed, 7.3% known).

A total of 1,698 members of the co-

hort (29.7%) had one or more forms of clinical CVD (Table 1). The most prevalent form was cardiac. It occurred mostly in isolation. Much less prevalent was CBD, half of which occurred as isolated disease, the rest together with cardiac and/or peripheral arterial disease. The least common form of disease was PAD, with most individuals having concomitant CVD elsewhere. Men had 10% higher prevalence of disease than women ( $P < 0.0001$ ).

Of the 4,014 participants without clinical CVD, 2,437 (60.7%) had one or more forms of isolated subclinical CVD (Table 2). The most prevalent form was CBD, which was present in approximately half of participants. Subclinical cardiac disease was less common, and PAD was the least common. The prevalence in men was 6% greater than in women ( $P < 0.0001$ ).

Table 3 shows the overall prevalences of clinical and isolated subclinical cardiac, cerebral, peripheral, and total CVD in the cohort categorized by glucose status (more detailed data of disease prevalence

**Table 3—Prevalences and ORs of clinical and isolated subclinical CVD categorized by glucose status and sex in the CHS cohort**

|                         | Prevalence    |      |                          |                | OR†           |       |                          |                | Test of trend |
|-------------------------|---------------|------|--------------------------|----------------|---------------|-------|--------------------------|----------------|---------------|
|                         | Normoglycemia | IFG  | Newly diagnosed diabetes | Known diabetes | Normoglycemia | IFG   | Newly diagnosed diabetes | Known diabetes |               |
| Men                     |               |      |                          |                |               |       |                          |                |               |
| Clinical                |               |      |                          |                |               |       |                          |                |               |
| Cardiac                 | 28.8          | 27.6 | 35.8                     | 44.1           | 1.00          | 0.95  | 1.41*                    | 2.08*          | <0.001        |
| CBD                     | 8.6           | 8.6  | 13.5                     | 12.6           | 1.00          | 1.03  | 1.61*                    | 1.52*          | 0.02          |
| PAD                     | 3.4           | 3.1  | 5.6                      | 7.1            | 1.00          | 0.94  | 1.67                     | 2.20*          | 0.002         |
| Any clinical disease    | 34.5          | 34.0 | 44.7                     | 51.3           | 1.00          | 1.00  | 1.56*                    | 2.12*          | <0.001        |
| Subclinical             |               |      |                          |                |               |       |                          |                |               |
| Cardiac                 | 23.7          | 29.5 | 34.5                     | 29.3           | 1.00          | 1.42* | 1.66*                    | 1.35           | 0.14          |
| CBD                     | 49.7          | 53.2 | 57.1                     | 56.0           | 1.00          | 1.18  | 1.32                     | 1.45           | 0.06          |
| PAD                     | 7.5           | 7.6  | 16.0                     | 21.6           | 1.00          | 1.06  | 2.29*                    | 3.63*          | <0.0001       |
| Any subclinical disease | 61.8          | 66.2 | 76.5                     | 73.3           | 1.00          | 1.27  | 1.97*                    | 1.85*          | 0.002         |
| Women                   |               |      |                          |                |               |       |                          |                |               |
| Clinical                |               |      |                          |                |               |       |                          |                |               |
| Cardiac                 | 19.2          | 24.6 | 25.1                     | 42.4           | 1.00          | 1.39* | 1.41*                    | 3.01*          | <0.0001       |
| CBD                     | 5.2           | 4.3  | 7.0                      | 12.7           | 1.00          | 0.82  | 1.32                     | 2.22*          | 0.0001        |
| PAD                     | 2.2           | 2.4  | 3.5                      | 6.5            | 1.00          | 1.10  | 1.60                     | 3.00*          | 0.0004        |
| Any clinical disease    | 23.6          | 27.5 | 30.4                     | 49.8           | 1.00          | 1.25  | 1.40*                    | 3.09*          | <0.0001       |
| Subclinical             |               |      |                          |                |               |       |                          |                |               |
| Cardiac                 | 18.7          | 21.6 | 25.9                     | 28.5           | 1.00          | 1.20  | 1.54*                    | 1.43*          | 0.06          |
| CBD                     | 45.1          | 44.5 | 51.3                     | 65.0           | 1.00          | 1.03  | 1.30                     | 2.53*          | <0.0001       |
| PAD                     | 8.7           | 9.6  | 8.2                      | 26.8           | 1.00          | 1.20  | 0.87                     | 3.49*          | <0.0001       |
| Any subclinical disease | 56.4          | 56.8 | 66.5                     | 78.9           | 1.00          | 1.06  | 1.55*                    | 2.83*          | <0.0001       |

Data are n. \*Statistically significant ( $P < 0.05$ ); †age- and race-adjusted.

Table 4—Data for Table 3

|                                                                         | Prevalence*    |       |                          |                | OR†            |       |                          |                | Test for trend |
|-------------------------------------------------------------------------|----------------|-------|--------------------------|----------------|----------------|-------|--------------------------|----------------|----------------|
|                                                                         | Normo-glycemia | IFG   | Newly diagnosed diabetes | Known diabetes | Normo-glycemia | IFG   | Newly diagnosed diabetes | Known diabetes |                |
| Men                                                                     |                |       |                          |                |                |       |                          |                |                |
| Clinical cardiac                                                        |                |       |                          |                |                |       |                          |                |                |
| History of MI                                                           | 14.75          | 13.19 | 22.79                    | 25.21          | 1.00           | 0.88  | 1.73‡                    | 2.06‡          | <0.0001        |
| History of CABG or PTCA                                                 | 7.90           | 8.64  | 9.30                     | 15.55          | 1.00           | 1.06  | 1.19                     | 2.21‡          | <0.001         |
| History of angina pectoris or use of nitroglycerin                      | 20.04          | 15.88 | 24.19                    | 30.67          | 1.00           | 0.75  | 1.29                     | 1.86‡          | <0.0001        |
| History of CHF                                                          | 2.80           | 3.06  | 5.58                     | 5.04           | 1.00           | 1.11  | 2.09‡                    | 1.93‡          | 0.02           |
| Atrial fibrillation or pacemaker insertion                              | 5.04           | 4.18  | 6.98                     | 6.72           | 1.00           | 0.85  | 1.49                     | 1.55           | 0.05           |
| Isolated subclinical cardiac                                            |                |       |                          |                |                |       |                          |                |                |
| Major ECG changes                                                       | 22.32          | 28.27 | 33.61                    | 28.45          | 1.00           | 1.45‡ | 1.74‡                    | 1.41           | 0.094          |
| Rose questionnaire angina pectoris without a history of angina pectoris | 1.71           | 1.69  | 2.52                     | 1.72           | 1.00           | 0.98  | 1.39                     | 0.95           | 0.941          |
| Abnormal ejection fraction                                              | 1.92           | 2.76  | 2.83                     | 5.26           | 1.00           | 1.42  | 1.52                     | 3.06‡          | 0.047          |
| Abnormal wall motion                                                    | 2.24           | 3.24  | 4.72                     | 4.21           | 1.00           | 1.42  | 2.09                     | 1.98           | 0.174          |
| Isolated subclinical CBD                                                |                |       |                          |                |                |       |                          |                |                |
| Internal carotid thickness                                              | 14.06          | 17.30 | 18.49                    | 16.38          | 1.00           | 1.34  | 1.36                     | 1.25‡          | 0.43           |
| Common carotid thickness                                                | 13.49          | 16.46 | 23.53                    | 25.00          | 1.00           | 1.35  | 1.97‡                    | 2.50‡          | <0.0001        |
| Carotid stenosis >25%                                                   | 45.01          | 46.84 | 50.42                    | 51.72          | 1.00           | 1.10  | 1.22                     | 1.48           | 0.048          |
| Isolated subclinical PAD                                                |                |       |                          |                |                |       |                          |                |                |
| AAI <0.9                                                                | 7.12           | 7.17  | 15.97                    | 20.69          | 1.00           | 1.05  | 2.42‡                    | 3.62‡          | <0.0001        |
| Rose intermittent claudication                                          | 1.14           | 1.27  | 0.84                     | 3.45           | 1.00           | 1.19  | 0.69                     | 3.56‡          | 0.10           |
| Women                                                                   |                |       |                          |                |                |       |                          |                |                |
| Clinical cardiac                                                        |                |       |                          |                |                |       |                          |                |                |
| History of MI                                                           | 7.02           | 9.64  | 13.66                    | 19.59          | 1.00           | 1.43  | 2.15‡                    | 2.99‡          | <0.0001        |
| History of CABG or PTCA                                                 | 2.16           | 2.65  | 3.96                     | 7.35           | 1.00           | 1.25  | 1.95                     | 3.31‡          | <0.0001        |
| History of angina pectoris or use of nitroglycerin                      | 14.75          | 16.63 | 18.50                    | 31.84          | 1.00           | 1.16  | 1.31                     | 2.59‡          | <0.0001        |
| History of CHF                                                          | 1.79           | 1.93  | 3.52                     | 7.76           | 1.00           | 1.10  | 1.95                     | 4.25‡          | <0.0001        |
| Atrial fibrillation or pacemaker insertion                              | 2.00           | 4.58  | 5.73                     | 4.08           | 1.00           | 2.52‡ | 3.18‡                    | 2.28‡          | 0.02           |
| Isolated subclinical cardiac                                            |                |       |                          |                |                |       |                          |                |                |
| Major ECG changes                                                       | 16.42          | 19.27 | 22.15                    | 25.20          | 1.00           | 1.22  | 1.47                     | 1.36           | 0.12           |
| Rose questionnaire angina pectoris without a history of angina pectoris | 2.88           | 2.99  | 3.80                     | 4.07           | 1.00           | 1.07  | 1.32                     | 1.65           | 0.27           |
| Abnormal ejection fraction                                              | 0.24           | 1.16  | 0.70                     | 1.19           | 1.00           | 5.04‡ | 3.00                     | 6.24           | 0.17           |
| Abnormal wall motion                                                    | 0.97           | 1.93  | 1.40                     | 4.76           | 1.00           | 2.06  | 1.46                     | 5.50‡          | 0.014          |
| Isolated subclinical CBD                                                |                |       |                          |                |                |       |                          |                |                |
| Internal carotid thickness                                              | 15.55          | 20.93 | 20.25                    | 29.27          | 1.00           | 1.54‡ | 1.39                     | 2.27‡          | 0.001          |
| Common carotid thickness                                                | 15.50          | 17.61 | 15.19                    | 31.71          | 1.00           | 1.24  | 0.98                     | 2.54‡          | 0.0003         |
| Cartoid stenosis >25%                                                   | 38.66          | 39.20 | 46.20                    | 55.28          | 1.00           | 1.08  | 1.40‡                    | 2.31‡          | <0.0001        |
| Isolated subclinical PAD                                                |                |       |                          |                |                |       |                          |                |                |
| AAI <0.9                                                                | 8.43           | 9.63  | 6.96                     | 24.39          | 1.00           | 1.24  | 0.74                     | 3.14‡          | 0.0004         |
| Rose intermittent claudication                                          | 0.92           | 0.33  | 1.27                     | 4.07           | 1.00           | 0.39  | 1.35                     | 4.98‡          | 0.003          |

\*Prevalence is crude without adjustment for age or sex; †age- and sex-adjusted; ‡statistically significant; 95% CIs do not include 1. CABG, coronary artery bypass grafting; CHF, congestive heart failure; MI, myocardial infarction; PTCA, percutaneous transluminal coronary angioplasty.

in each vascular bed according to glucose status appear in Table 4). Men and women with known diabetes had, respectively, two and three times greater odds of having clinical CVD compared with those with normal glucose status. Similar odds were present for isolated subclinical CVD. For each individual component of clinical and subclinical CVD, there was a trend for

increasing prevalence with increasing glucose severity, other than subclinical cardiac and CBD in men. In addition, among women, any clinical disease, subclinical CBD, and subclinical PAD, showed evidence of an increase across categories in excess of a linear trend, as indicated by a statistically significant ( $P < 0.05$ ) quadratic trend in the log ORs.

Figure 1 shows the prevalence of total CVD by glucose status. Isolated subclinical CVD prevalence here is presented as the percentage of the total population, including those with and without clinical disease ( $n = 5,712$ ). Using this definition, 75% of men with normal glucose status had clinical or subclinical CVD. Among those with known diabetes, 87% had clin-



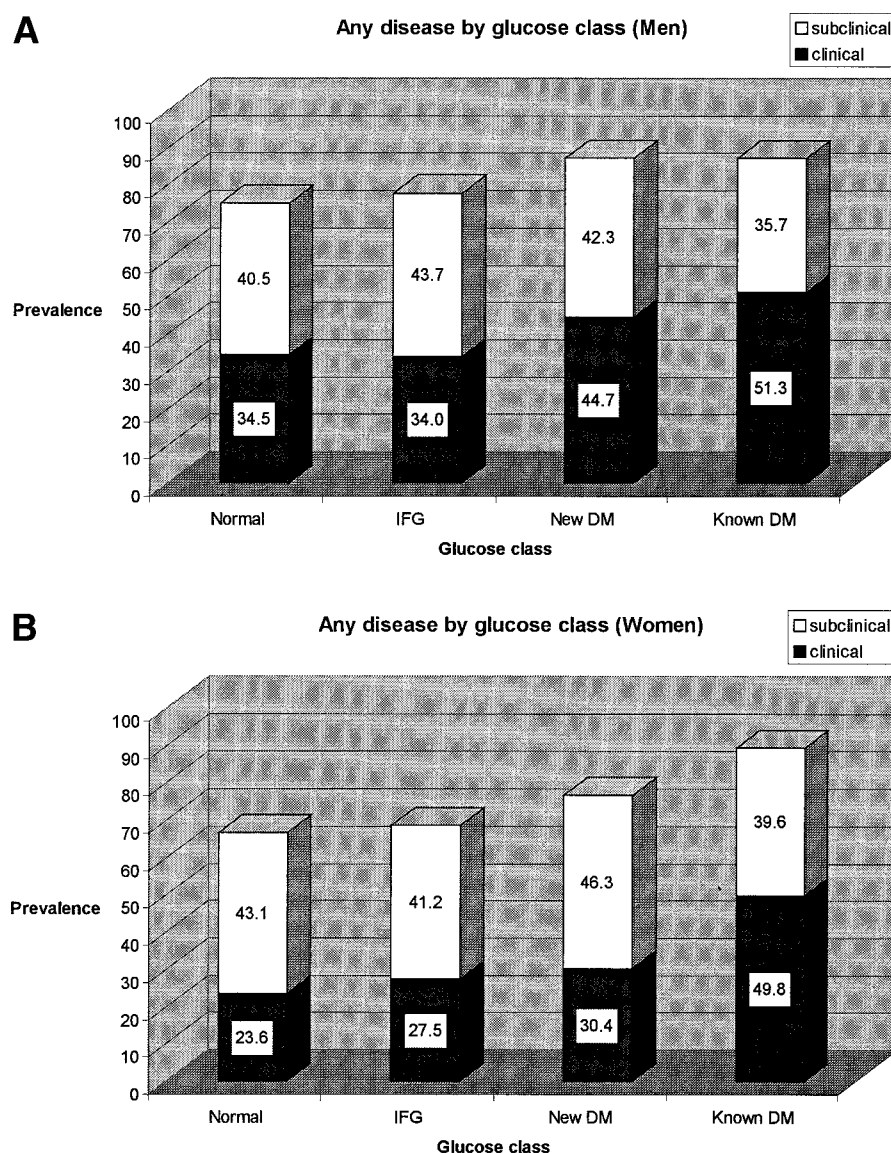

**Figure 1**—Prevalence of total CVD by glucose status. DM, diabetes mellitus.

ical or subclinical CVD (age- and race-adjusted OR 2.46,  $P < 0.0001$ ). The proportion of total CVD that was clinical increased with worsening glucose severity. Among women, the prevalence of clinical or subclinical CVD was 66.7% in those with normal glucose status and 89.4% in those with known diabetes (age- and race-adjusted OR 4.22,  $P < 0.0001$ ). Similar to men, the proportion among women of total CVD that was clinical relative to subclinical was higher with worsening glucose intolerance. Interestingly, 11.8% of the known diabetic male and female participants did not have either clinical or subclinical disease.

**CONCLUSIONS**— Unlike previous studies that have examined the prevalence of CVD in relation to glucose disorders, this study has arrived at an overall estimate of CVD prevalence based on a summation of clinical and subclinical disease parameters in three vascular beds. We found that ~30% of the cohort had clinical CVD in at least one vascular bed. Of those without clinical disease, ~60% had some form of isolated subclinical disease. The risk of having either clinical or isolated subclinical CVD was higher in the presence of a glucose disorder and increased with glucose severity. The increased risk was more pronounced in

women than in men. Lastly, it was found that clinical CVD made up a larger proportion of the total CVD burden among those with glucose disorders than among those with normal fasting glucose status. Taken together, these results are consistent with the hypothesis that factors associated with glucose disorders promote atherosclerosis and also effect its progression to clinical disease.

By the criteria used in this study, clinical CVD was mostly cardiac, whereas isolated subclinical disease was mostly cerebrovascular (i.e., carotid disease). This latter finding, however, is a function of the tests used for measuring subclinical CVD. If duplex scanning of the femoral arteries or computed tomography scanning of the chest had been performed, it is likely that the prevalence of subclinical PAD and coronary artery disease would have been higher. Prior analysis of CHS has shown that subclinical carotid disease is closely related to prevalent and incident heart disease (3,15). Other studies have shown a significant inverse relationship between carotid wall disease and AAI (16). Carotid disease can therefore be considered a marker of subclinical atherosclerosis.

It should be noted that the increase in prevalence of CVD was not as large from normoglycemia to IFG as was the increase from IFG to newly diagnosed diabetes. This finding can be interpreted in two ways. One explanation is that prevalence of CVD increases mostly in the presence of elevated and sustained blood glucose levels. The alternative explanation is that the category of IFG does not capture a distinct subset of individuals with glucose disorders who have CVD. We, and others, have shown that IFG is much less sensitive than the World Health Organization (WHO) category of impaired glucose tolerance for capturing the prevalence of CVD (17,18).

Previous studies have shown that the odds of having clinical cardiac disease are higher for diabetic women than for diabetic men (19). In the present study, we found similar results. In addition, we extended these findings to include the stages of IFG and newly diagnosed diabetes. We have also shown that diabetic women have higher odds of having clinical and subclinical CBD and PAD than men. The lower absolute prevalence of CVD (both clinical and subclinical) among women with normal glucose sta-

tus as compared with men may explain the relatively larger increase in CVD prevalence among women with progressive glucose severity.

It is of interest that almost 12% of the known diabetic subjects in this cohort did not have evidence of either clinical or subclinical CVD. Preliminary analysis shows that they were less likely to be taking BP medications than those with CVD (53 vs. 69%, respectively;  $P < 0.05$ ) (data not shown). Those without CVD, however, did not differ significantly from those with CVD with regard to fasting and 2-h glucose values; total, HDL, and LDL cholesterol levels; systolic and diastolic BP; current smoking; or inflammatory markers that are believed to be associated with atherosclerosis, such as fibrinogen, albumin, and C-reactive protein (data not shown). Further studies will be necessary to determine the protective mechanisms in this unique subgroup.

This study has several strengths. First, selection of participants was designed to obtain a representative sample of the U.S. population aged  $\geq 65$  years. As such, the results are generalizable. On the other hand, institutionalized individuals and those with serious illnesses, such as severe congestive heart failure and stroke, were excluded. Therefore, severe CVD complications associated with diabetes may be underrepresented. This would have the effect of making our results conservative estimates. Second, the tests for detecting subclinical CVD were noninvasive. Two of the tests (ECG and AAI) are office-based. The weaknesses of this study should also be noted. The classification of glucose disorders was based on one fasting glucose value and not on two values, as recommended by the ADA (14). Second, the fasting ADA criteria were used, as compared with prior studies that have used the WHO criteria (17). The fasting ADA criteria are not as sensitive as the WHO criteria for detecting clinical CVD in the elderly (17,18). Despite this, our results are similar to previous studies.

Recently, we have shown that subclinical CVD is the primary determinant of incident clinical CVD in individuals with glucose disorders (2). Considering the high prevalence of isolated subclinical CVD among participants with glucose disorders, efforts at CVD risk factor reduction in those without clinical CVD seem warranted.

### Participating institutions and principal staff

Bowman Gray School of Medicine of Wake Forest University, NC: Gregory L. Burke, Sharon Jackson, Alan Elster, Curt D. Furberg, Gerardo Heiss, Dalane Kitzman, Margie Lamb, David S. Lefkowitz, Mary F. Lyles, Cathy Nunn, Ward Riley, John Chen, Beverly Tucker; ECG Reading Center, Wake Forest University, NC: Farida Rautaharju, Pentti Rautaharju; University of California, Davis, CA: William Bonekat, Charles Bernick, Michael Buonocore, Mary Haan, Calvin Hirsch, Lawrence Laslett, Marshall Lee, John Robbins, William Seavey, Richard White; The Johns Hopkins University, MD: M. Jan Busby-Whitehead, Joyce Chabot, George W. Comstock, Adrian Dobs, Linda P. Fried, Joel G. Hill, Steven J. Kittner, Shiriki Kumanyika, David Levine, Joao A. Lima, Neil R. Powe, Thomas R. Price, Jeff Williamson, Moyses Szklo, Melvyn Tockman; MRI Reading Center, The Johns Hopkins University, MD: Norman Beauchamp, R. Nick Bryan, Douglas Fellows, Melanie Hawkins, Patrice Holtz, Naiyer Iman, Michael Kraut, Cynthia Quinn, Grace Lee, Carolyn C. Meltzer, Larry Schertz, Earl P. Steinberg, Scott Wells, Linda Wilkins, Nancy C. Yue; University of Pittsburgh, PA: Diane G. Ives, Charles A. Jungreis, Laurie Knepper, Lewis H. Kuller, Elaine Meilahn, Peg Meyer, Robert Moyer, Anne Newman, Richard Schulz, Vivienne E. Smith, Sidney K. Wolfson; Echocardiography Reading Center (Baseline)—University of California, Irvine, CA: Hoda Anton-Culver, Julius M. Gardin, Margaret Knoll, Tom Kurosaki, Nathan Wong; Echocardiography Reading Center (Follow-Up), Georgetown Medical Center, Washington, DC: John Gottdiener, Eva Hausner, Stephen Kraus, Judy Gay, Sue Livengood, Mary Ann Yohe, Retha Webb; Massachusetts, Ultrasound Reading Center, New England Medical Center, Boston, MA: Daniel H. O'Leary, Joseph F. Polak, Laurie Funk; Central Blood Analysis Laboratory, University of Vermont, VT: Elaine Cornell, Mary Cushman, Russell P. Tracy; Pulmonary Reading Center, University of Arizona, Tucson, AZ: Paul Enright; Coordinating Center, University of Washington, Seattle, WA: Alice Arnold, Annette L. Fitzpatrick, Richard A. Kronmal, Bruce M. Psaty, David S. Siscovick, Will Longstreth, Patricia W. Wahl, David Yanez, Paula Diehr, Corrine Dulberg, Bonnie

Lind, Thomas Lumley, Ellen O'Meara, Jennifer Nelson, Charles Spiekerman; NHLBI Project Office: Robin Boineau, Teri A. Manolio, Peter J. Savage, Patricia Smith.

### References

1. Psaty BM, Furberg CD, Kuller LH, Bild DE, Rautaharju PM, Polak JF, Bovill E, Gottdrener JS: Traditional risk factors and subclinical disease measures as predictors of first myocardial infarction in older adults: the Cardiovascular Health Study. *Arch Intern Med* 159:1339–1347, 1999
2. Kuller LH, Velentgas P, Barzilay J, Beauchamp NJ, O'Leary DH, Savage PJ: Diabetes mellitus: subclinical cardiovascular disease and risk of incident cardiovascular disease and all-cause mortality. *Arterioscler Thromb Vasc Biol* 20:823–829, 2000
3. O'Leary DH, Polak JF, Kronmal RA, Manolio TA, Burke GL, Wolfson SK Jr: Carotid-artery intima and media thickness as a risk factor for myocardial infarction and stroke in older adults: Cardiovascular Health Study Collaborative Research Group. *N Engl J Med* 340:14–22, 1999
4. Newman AB, Tyrrell KS, Kuller LH: Mortality over four years in SHEP participants with a low ankle-arm index. *J Am Geriatr Soc* 45:1472–1478, 1997
5. Pyorala K, Laakso M, Uusitupa M: Diabetes and atherosclerosis: an epidemiologic view. *Diabetes Metab Rev* 3:463–524, 1987
6. Fried LP, Borhani NO, Enright P, Furberg CD, Gardin JM, Kronmal RA, Kuller LH, Manolio TA, Mittelmark MB, Newman A: The Cardiovascular Health Study: design and rationale. *Ann Epidemiol* 1:263–276, 1991
7. Cushman M, Cornell ES, Howard PR, Bovill EG, Tracy RP: Laboratory methods and quality assurance in the Cardiovascular Health Study. *Clin Chem* 41:264–270, 1995
8. Furberg CD, Manolio TA, Psaty BM, Bild DE, Borhani NO, Newman A, Tabatznik B, Rautaharju PM: Major electrocardiographic abnormalities in persons ages 65 years and older: the Cardiovascular Health Study. *Am J Cardiol* 69:1329–1335, 1992
9. Wolf H, MacInnis PJ, Stock S, Helppi RK, Rautaharju PM: The Dalhousie Program: a comprehensive analysis program for rest and exercise electrocardiograms. In *Computer Application on ECG and VCG Analysis*. Zywiets C, Schneider B, Eds. Amsterdam-London, North Holland Publishing, 1973, p. 231–232
10. O'Leary DH, Polak JF, Wolfson SK Jr, Bond MG, Bommer W, Sheth S, Psaty BM, Sharrett AR, Manolio TA: Use of sonogra-

- phy to evaluate carotid atherosclerosis in the elderly: the Cardiovascular Health Study. *Stroke* 22:1155–1163, 1991
11. Newman AB, Siscovik DS, Manolio TA, Polak J, Fried LP, Borhani NO, Wolfson SK: Ankle-arm index as a marker of atherosclerosis in the Cardiovascular Health Study. *Circulation* 88:837–845, 1993
  12. Kuller L, Borhani NO, Furberg G, Gardin JM, Manolio T, O'Leary D, Psaty B, Robbins J: Prevalence of subclinical atherosclerosis and cardiovascular disease and association with risk factors in the Cardiovascular Health Study. *Am J Epidemiol* 139: 1164–1179, 1994
  13. Blackburn H, Keys A, Simonson E, Rautaharju P, Punsar S: The electrocardiogram in population studies: a classification system. *Circulation* 21:1160–1175, 1960
  14. American Diabetes Association: Report of the Expert Committees on the Diagnosis and Classification of Diabetes Mellitus. *Diabetes Care* 20:1183–1197, 1997
  15. O'Leary DH, Polak JF, Kronmal RA, Kittner SJ, Bond MG, Wolfson SK Jr, Bommer W, Price TR, Garden JM, Savage PJ: Distribution and correlates of sonographically detected carotid artery disease in the Cardiovascular Health Study: the CHS Collaborative Research Group. *Stroke* 23: 1752–1760, 1992
  16. Papamichael CM, Lekakis JP, Stameateopoulos KS, Papaioannou TG, Alevizaki MK, Cimponeriu AT, Kanakakis JE, Pappanagiotou A, Kalofontis AT, Stamatelopoulos SF: Ankle-brachial index as predictor of the extent of coronary atherosclerosis and cardiovascular events in patients with coronary artery disease. *Am J Cardiol* 86:615–618, 2000
  17. Barzilay JI, Spiekerman CF, Wahl PW, Kuller LH, Cushman M, Furberg CD, Dobs A, Polak JF, Savage PJ: Cardiovascular disease in older adults with glucose disorders: comparison of American Diabetes Association criteria for diabetes mellitus with WHO criteria. *Lancet* 354:622–625, 1999
  18. Tominaga M, Eguchi H, Manaka H, Igarashi K, Kato T, Sekikawa A: Impaired glucose tolerance is a risk factor for cardiovascular disease, but not impaired fasting glucose: the Funagata Diabetes Study. *Diabetes Care* 22:920–924, 1999
  19. Barrett-Connor E, Cohn BA, Wingard DL, Edelstein SL: Why is diabetes mellitus a stronger risk factor for fatal ischemic heart disease in women than in men? The Rancho Bernardo Study. *JAMA* 265:627–631, 1991
